# Supplementary material for: Survey of Global Genetic Diversity Within theDrosophilaImmune System
Source: Oxford University Press journal article supplement (doi:10.1534/genetics.116.195016), 2016-11-05
Supplement: figures1.pdf [file figures1.pdf]

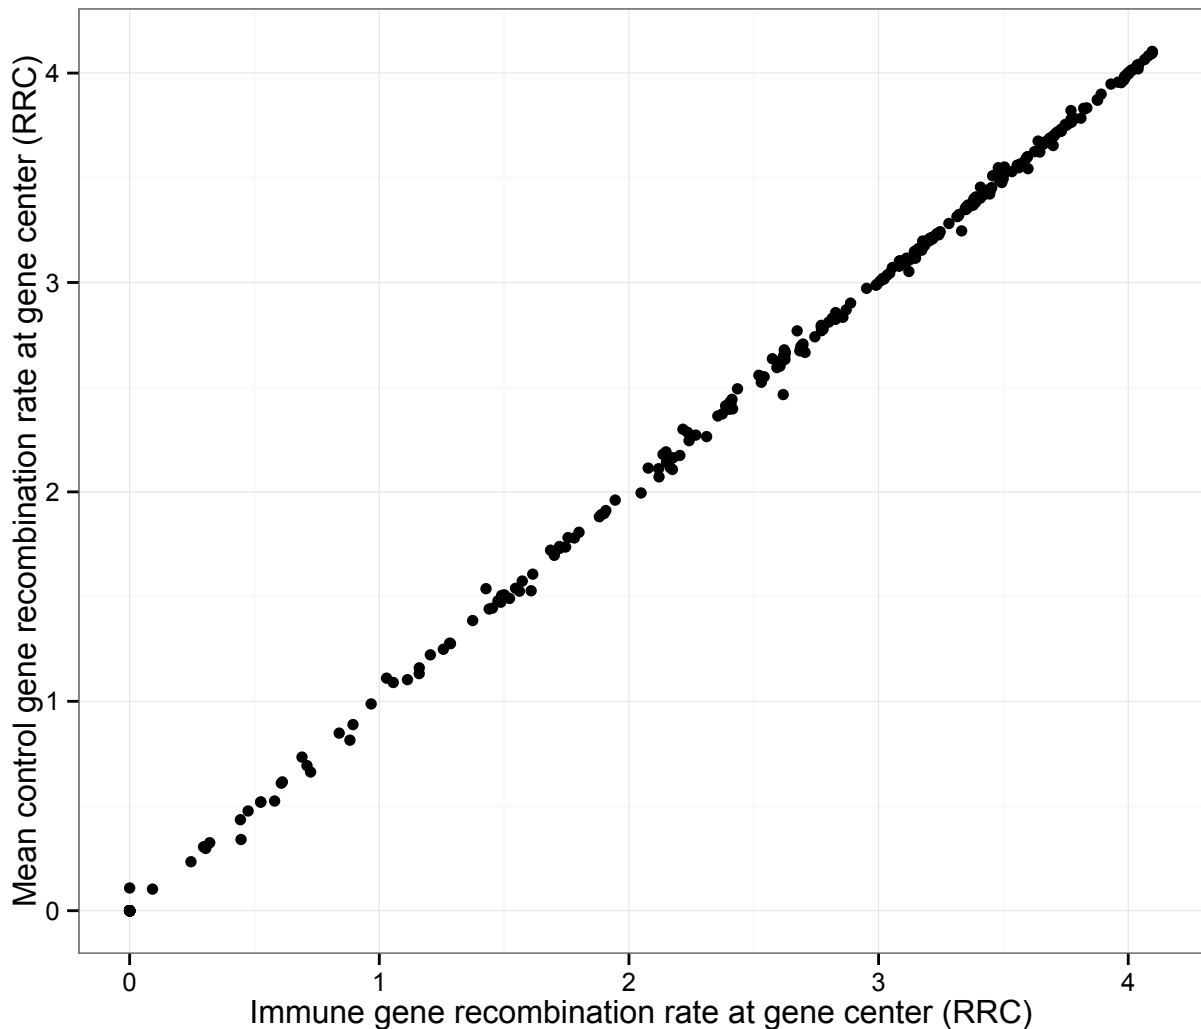

**Figure S1.** Plot of each immune gene's center recombination rate versus the mean of the control genes' center recombination rates as calculated with the Recombination Rate Calculator v 2.3 (Fiston-Lavier et al. 2010).
