# Supplementary material for: Survey of Global Genetic Diversity Within theDrosophilaImmune System
Source: Oxford University Press journal article supplement (doi:10.1534/genetics.116.195016), 2016-11-05
Supplement: figures2.pdf [file figures2.pdf]

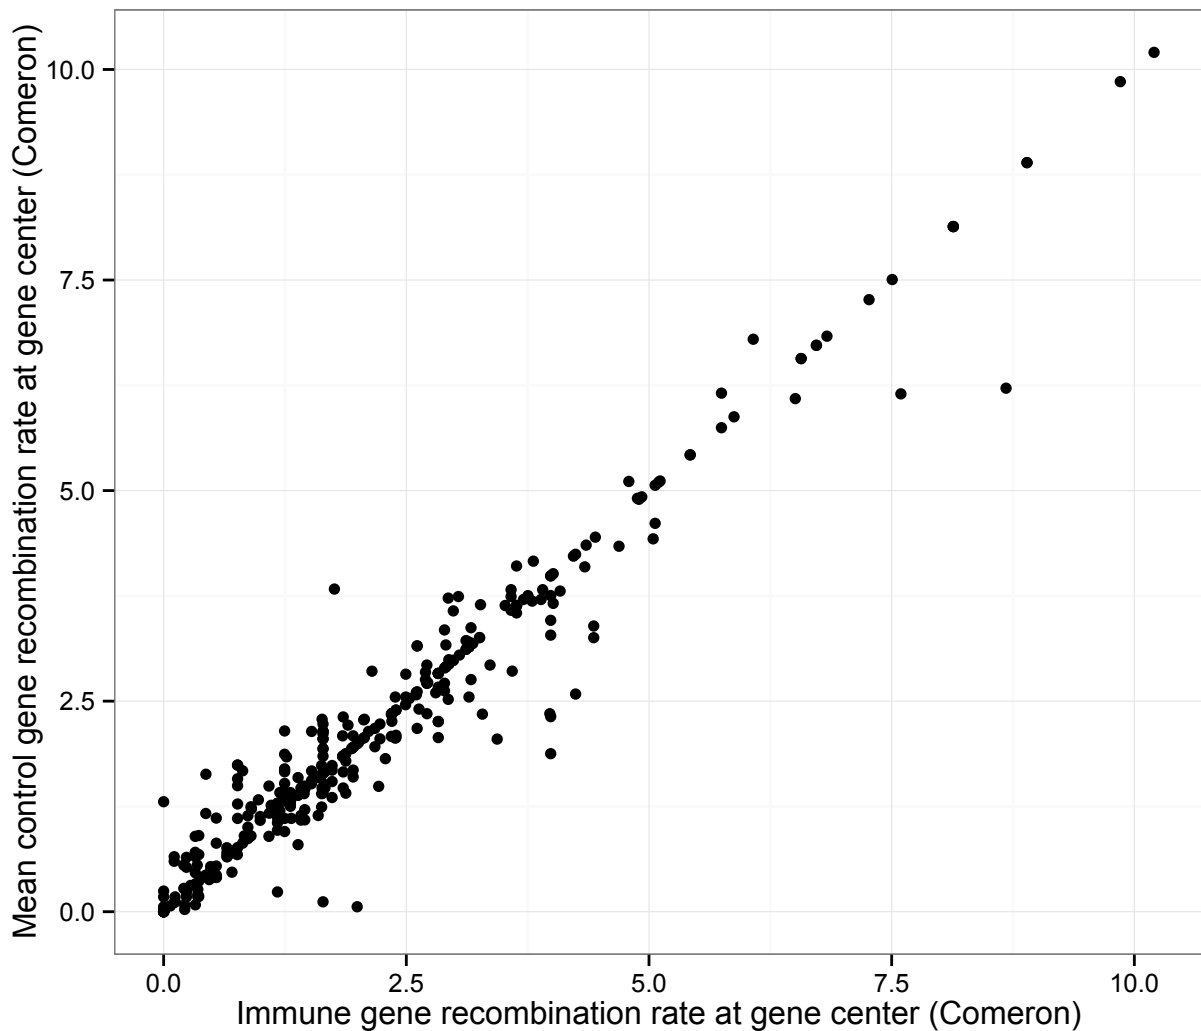

**Figure S2.** Plot of each immune gene's center recombination rate versus the mean control genes' center recombination rates as calculated by Comeron et al. (2012).
