# Supplementary material for: Survey of Global Genetic Diversity Within theDrosophilaImmune System
Source: Oxford University Press journal article supplement (doi:10.1534/genetics.116.195016), 2016-11-05
Supplement: figures3.pdf [file figures3.pdf]

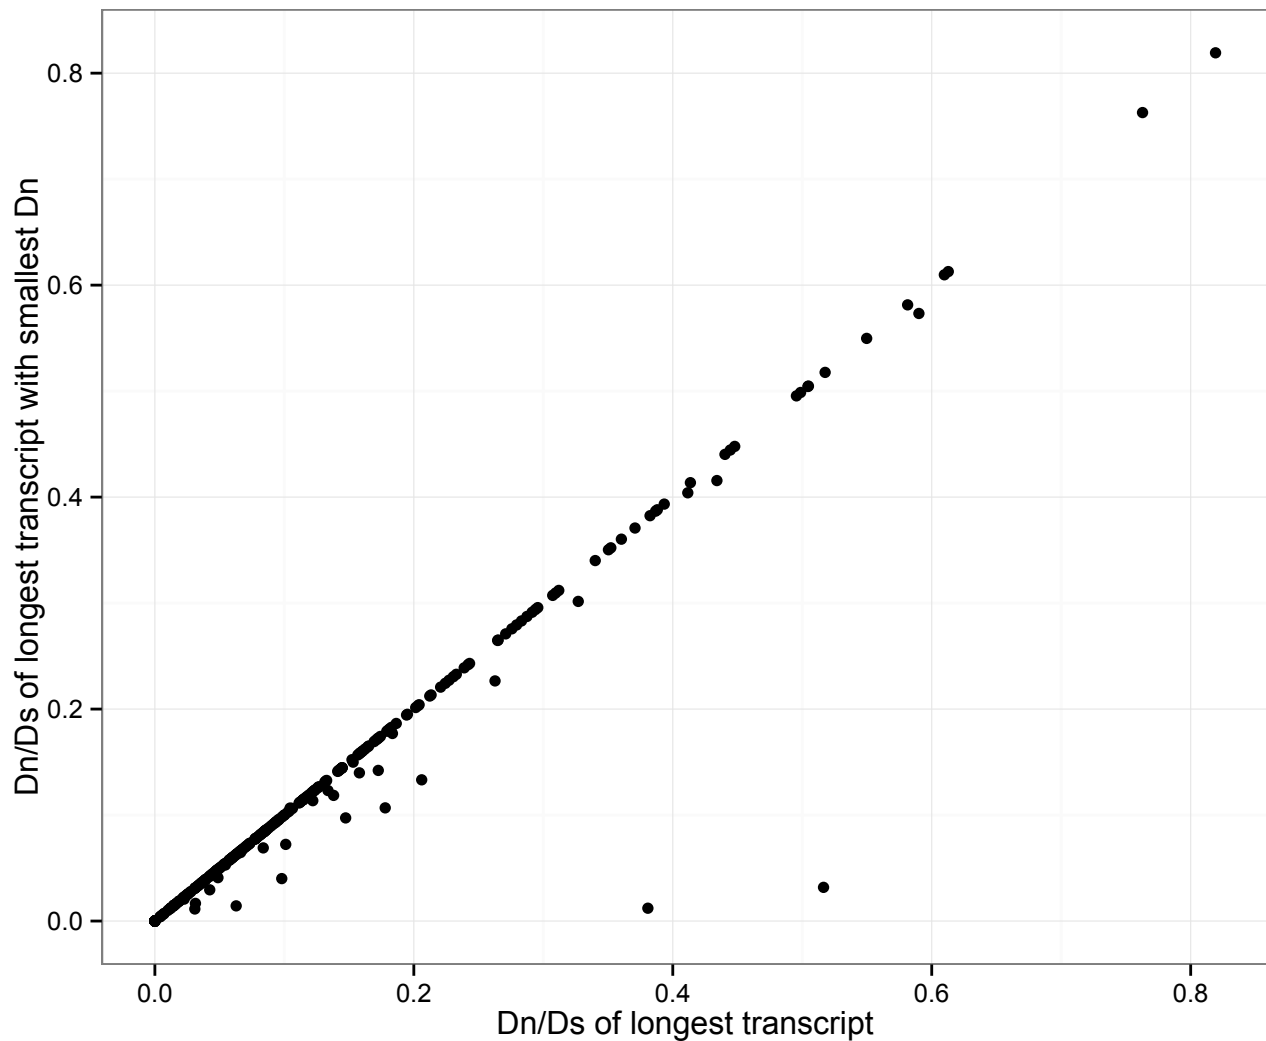

**Figure S3.** Plot of transcript-level *D. melanogaster*-*D. simulans* divergence (Dn/Ds) as calculated with the longest transcript pair versus our method which additionally chose the pair with the fewest non-synonymous changes.
